# Supplementary material for: PDMS/TiO2 and PDMS/SiO2 Nanocomposites: Mechanical Properties’ Evaluation for Improved Insulating Coatings
Source: MDPI journal article supplement (doi:10.3390/nano13101699), 2023-05-22
Supplement: s1 [file s1]

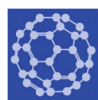

# PDMS/TiO<sub>2</sub> and PDMS/SiO<sub>2</sub> Nanocomposites: Mechanical Properties' Evaluation for Improved Insulating Coatings

Aldo Cordoba <sup>1</sup>, Eric Mauricio Rivera-Muñoz <sup>2</sup>, Rodrigo Velázquez-Castillo <sup>1</sup> and Karen Esquivel <sup>1,\*</sup>

<sup>1</sup> Graduate and Research Division, Engineering Faculty, Universidad Autónoma de Querétaro, Cerro de las Campanas, Querétaro 76010, Mexico; acordoba07@alumnos.uaq.mx (A.C.); rodrigo.velazquez@uaq.mx (R.V.-C.)

<sup>2</sup> Center for Applied Physics and Advanced Technology, National Autonomous University of Mexico, A.P. 1-1010, Querétaro 76000, Mexico; emrivera@fata.unam.mx

\* Correspondence: karen.esquivel@uaq.mx; Tel.: +52-442-192-12-00 (ext. 65401)

**Table S1.** Reaction efficiency of the sol-gel method for TiO<sub>2</sub> nanoparticles.

| # | Date       | C <sub>3</sub> H <sub>7</sub> OH (ml) | C <sub>12</sub> H <sub>28</sub> O <sub>4</sub> Ti (ml) | H <sub>2</sub> O (ml) | TiO <sub>2</sub> (g) |
|---|------------|---------------------------------------|--------------------------------------------------------|-----------------------|----------------------|
| 1 | 21/09/2020 | 142                                   | 14                                                     | 142                   | 3.643                |
| 2 | 12/10/2020 | 142                                   | 14                                                     | 142                   | 3.489                |
| 3 | 21/06/2021 | 142                                   | 14                                                     | 142                   | 3.895                |

**Table S2.** Reaction efficiency of the sol-gel method for SiO<sub>2</sub> nanoparticles.

| # | Date       | H <sub>2</sub> O (ml) | C <sub>2</sub> H <sub>5</sub> OH (ml) | TEOS (ml) | SiO <sub>2</sub> (g) |
|---|------------|-----------------------|---------------------------------------|-----------|----------------------|
| 1 | 22/09/2020 | 1.2                   | 4 ml                                  | 3.78      | 0.316                |
| 2 | 23/09/2020 | 2.4                   | 8 ml                                  | 7.56      | 0.661                |
| 3 | 12/10/2020 | 3.6                   | 12 ml                                 | 11.3      | 2.543                |
| 4 | 23/06/2021 | 7.1                   | 24 ml                                 | 22.6      | 4.102                |

**Table S3.** Composite crosslinking performance results.

| NPs (%) | TiO <sub>2</sub> (%) |        | SiO <sub>2</sub> (%) |        |
|---------|----------------------|--------|----------------------|--------|
| 0       | 95.40                | ± 0.31 | 95.4                 | ± 0.31 |
| 2       | 95.44                | ± 0.30 | 95.94                | ± 0.25 |
| 4       | 95.55                | ± 0.22 | 95.84                | ± 0.29 |
| 8       | 95.54                | ± 0.13 | 96.05                | ± 0.39 |
| 10      | 95.73                | ± 0.21 | 95.94                | ± 0.11 |
